# Supplementary material
Source: PubMed Central journal article supplement (PMC9589096)
Supplement: mmc1.pdf [file mmc1.pdf]

**Supplemental information**

**Functional immune responses against SARS-CoV-2  
variants of concern after fourth COVID-19 vaccine  
dose or infection in patients with blood cancer**

**Annika Fendler, Scott T.C. Shepherd, Lewis Au, Mary Wu, Ruth Harvey, Katalin A. Wilkinson, Andreas M. Schmitt, Zayd Tippu, Benjamin Shum, Sheima Farag, Aljosja Rogiers, Eleanor Carlyle, Kim Edmonds, Lyra Del Rosario, Karla Lingard, Mary Mangwende, Lucy Holt, Hamid Ahmod, Justine Korteweg, Tara Foley, Taja Barber, Andrea Emslie-Henry, Niamh Caulfield-Lynch, Fiona Byrne, Daqi Deng, Svend Kjaer, Ok-Ryul Song, Christophe J. Queval, Caitlin Kavanagh, Emma C. Wall, Edward J. Carr, Simon Caidan, Mike Gavrielides, James I. MacRae, Gavin Kelly, Kema Peat, Denise Kelly, Aida Murra, Kayleigh Kelly, Molly O'Flaherty, Robyn L. Shea, Gail Gardner, Darren Murray, Sanjay Popat, Nadia Yousaf, Shaman Jhanji, Kate Tatham, David Cunningham, Nicholas Van As, Kate Young, Andrew J.S. Furness, Lisa Pickering, Rupert Beale, Charles Swanton, Sonia Gandhi, Steve Gamblin, David L.V. Bauer, George Kassiotis, Michael Howell, Emma Nicholson, Susanna Walker, Robert J. Wilkinson, James Larkin, and Samra Turajlic**

**Table S1: Ordinal regression model of factors associated with Omicron BA.1 NAbT responses after 4 vaccine doses**

| Factor                                          | Ordinal regression model |      |        |         | ANOVA      |         |
|-------------------------------------------------|--------------------------|------|--------|---------|------------|---------|
|                                                 | Coefficient              | S.E. | Wald Z | P-value | Chi-Square | p-value |
| <b>Vaccine type (first and second dose)</b>     |                          |      |        |         | 0.13       | 0.72    |
| BNT162b2 (vs ChAdOx1)                           | -0.17                    | 0.48 | -0.35  | 0.72    |            |         |
| <b>Previous infection</b>                       |                          |      |        |         | 3.44       | 0.06    |
| SarS-CoV-2 infection before second vaccine dose | 1.40                     | 0.76 | 1.86   | 0.06    |            |         |
| <b>Diagnosis (vs acute leukaemia)</b>           |                          |      |        |         | 3.52       | 0.47    |
| Chronic lymphocytic leukaemia                   | 0.34                     | 0.98 | 0.35   | 0.72    |            |         |
| Myelodysplastic syndrome                        | -0.95                    | 1.41 | -0.67  | 0.50    |            |         |
| Myeloma                                         | 0.11                     | 0.98 | 0.12   | 0.91    |            |         |
| Lymphoma                                        | 1.31                     | 1.04 | 1.26   | 0.21    |            |         |
| <b>Anti-cancer therapy</b>                      |                          |      |        |         |            |         |
| B cell-depleting therapy                        | -3.72                    | 0.85 | -4.35  | <0.0001 | 18.89      | <.0001  |
| Chemo- or targeted therapy                      | -0.15                    | 0.64 | -0.24  | 0.81    | 0.06       | 0.81    |

NAbT were binned in undetected/low ( $\leq 40$ ), moderate ( $>40-256$ ), or high ( $>256$ ) †For anti-cancer therapy indicated treatment was tested for patients who received the treatment vs patients not receiving that treatment. BTKi, Bruton's tyrosine kinase inhibitor.

**Table S2: Ordinal regression model of factors associated with Omicron BA.2 NAbT responses after 4 vaccine doses**

| Factor                                          | Ordinal regression model |      |        |         | ANOVA      |         |
|-------------------------------------------------|--------------------------|------|--------|---------|------------|---------|
|                                                 | Coefficient              | S.E. | Wald Z | P-value | Chi-Square | p-value |
| <b>Vaccine type (first and second dose)</b>     |                          |      |        |         | 0.00       | 0.98    |
| BNT162b2 (vs ChAdOx1)                           | -0.01                    | 0.51 | -0.02  | 0.98    |            |         |
| <b>Previous infection</b>                       |                          |      |        |         | 1.01       | 0.32    |
| SarS-CoV-2 infection before second vaccine dose | 0.76                     | 0.76 | 1.00   | 0.32    |            |         |
| <b>Diagnosis (vs acute leukaemia)</b>           |                          |      |        |         | 3.5        | 0.48    |
| Chronic lymphocytic leukaemia                   | 0.85                     | 1.00 | 0.85   | 0.40    |            |         |
| Myelodysplastic syndrome                        | 1.17                     | 1.55 | 0.75   | 0.45    |            |         |
| Myeloma                                         | 1.52                     | 1.04 | 1.46   | 0.14    |            |         |
| Lymphoma                                        | 1.57                     | 1.06 | 1.48   | 0.14    |            |         |
| <b>Anti-cancer therapy</b>                      |                          |      |        |         |            |         |
| B cell-depleting therapy                        | -3.01                    | 0.81 | -3.73  | 0.0002  | 13.88      | 0.0002  |
| Chemo- or targeted therapy                      | -0.62                    | 0.73 | -0.85  | 0.40    | 0.72       | 0.40    |

NAbT were binned in undetected/low ( $\leq 40$ ), moderate ( $>40-256$ ), or high ( $>256$ ) †For anti-cancer therapy indicated treatment was tested for patients who received the treatment vs patients not receiving that treatment. BTKi, Bruton's tyrosine kinase inhibitor.
